# Supplementary material for: Copper complexes of synthetic peptides mimicking neurotrophin-3 enhance neurite outgrowth and CREB phosphorylation
Source: Royal Society of Chemistry journal article supplement (doi:10.1039/c9mt00045c), 2019-08-22
Supplement: c9mt00045c1.pdf [file c9mt00045c1.pdf]

## Copper complexes of synthetic peptides mimicking neurotrophin-3 enhance neurite outgrowth and CREB phosphorylation

Irina Naletova,<sup>a</sup> Giuseppa Ida Grasso,<sup>a</sup> Cristina Satriano,<sup>a</sup> Alessio Travaglia,<sup>a</sup> Diego La Mendola,<sup>\*b</sup> Giuseppe Arena<sup>\*a</sup> and Enrico Rizzarelli <sup>a</sup>

<sup>a</sup> Department of Chemical Sciences, University of Catania, Viale A.Doria 6, 95125 Catania, Italy.

<sup>b</sup> Department of Pharmacy, University of Pisa, Via Bonanno Pisano 6, 56126 Pisa, Italy.

### Contents

|                                                                           |    |
|---------------------------------------------------------------------------|----|
| 1. Protonation constant values                                            | S2 |
| 2. EPR spectra of Cu-NT3(1-5)                                             | S3 |
| 3. EPR spectra of Cu-AcNT3(5-13)                                          | S4 |
| 4. EPR spectra of Cu-NT3(1-13)                                            | S5 |
| 5. Species distribution diagram of the three peptide copper(II) complexes | S6 |
| 6. Phase contrast microscopy pictures neurite length                      | S7 |
| 7. Phase contrast microscopy pictures cells treated with Trks antibody    | S8 |
| 8. Effect of Scrambled and NT3(1-13) peptides on CREB phosphorylation     | S9 |

**Table 1.** Protonation constant ( $\log\beta_{qr}$ ) for the  $L_qH_r$  species and pK values (calculated as  $\log\beta$  difference between  $L_qH_r$  and  $L_qH_{r-1}$ ) for NT3(1-13), NT3(1-5) and AcNT3(5-13) (T= 298 K and I = 0.1 M KNO<sub>3</sub>).<sup>a</sup>

|                    | $\log\beta$ NT3(1-13) | $\log\beta$ NT3(1-5) | $\log\beta$ AcNT3(5-13) |
|--------------------|-----------------------|----------------------|-------------------------|
| LH                 | 9.75 (3)              | 10.39 (6)            | 10.07 (3)               |
| LH <sub>2</sub>    | 19.23 (3)             | 20.00 (8)            | 19.48 (3)               |
| LH <sub>3</sub>    | 26.66 (3)             | 27.44 (1)            | 25.92 (5)               |
| LH <sub>4</sub>    | 33.23 (3)             | 33.6 (1)             | 30.25 (6)               |
| LH <sub>5</sub>    | 39.11 (3)             | 37.5 (1)             | -                       |
| LH <sub>6</sub>    | 43.37 (4)             | -                    | -                       |
| LH <sub>7</sub>    | 46.92 (4)             | -                    | -                       |
| pK Tyr/Lys         | 9.75                  | 10.39                | 10.07                   |
| pK Tyr/Lys         | 9.48                  | 9.61                 | 9.41                    |
| pK NH <sub>2</sub> | 7.43                  | 7.44                 | -                       |
| pK His             | 6.57                  | 6.21                 | 6.44                    |
| pK His             | 5.88                  | -                    | -                       |
| pK Glu             | 4.26                  | 3.83                 | 4.33                    |
| pK Glu             | 3.55                  | -                    | -                       |

<sup>a</sup> Standard deviations ( $3\sigma$  values) are given in parentheses. Charges are omitted for clarity.

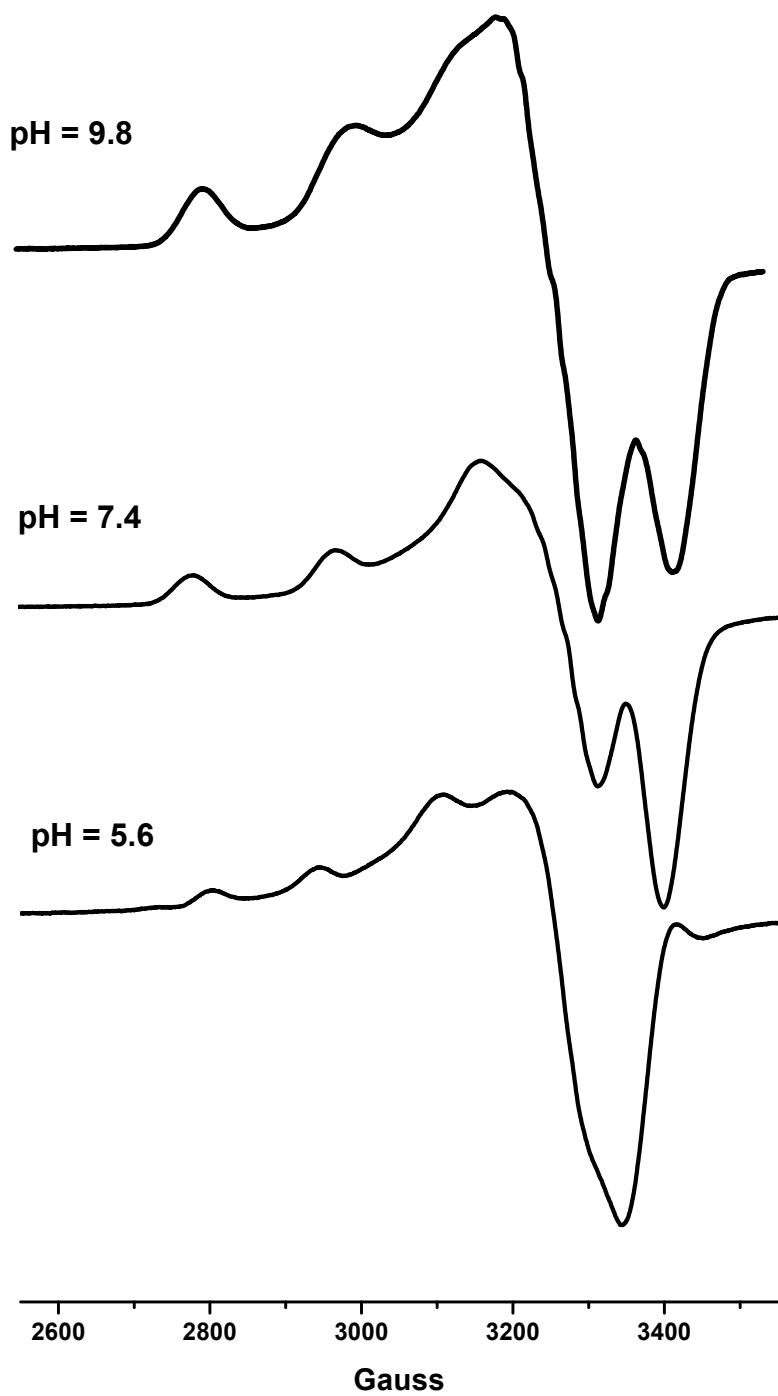

**Figure S1.** EPR spectra of Cu-NT3(1-5) at 1:1 molar ratio.  $[Cu^{2+}] = 1 \times 10^{-3}$  M

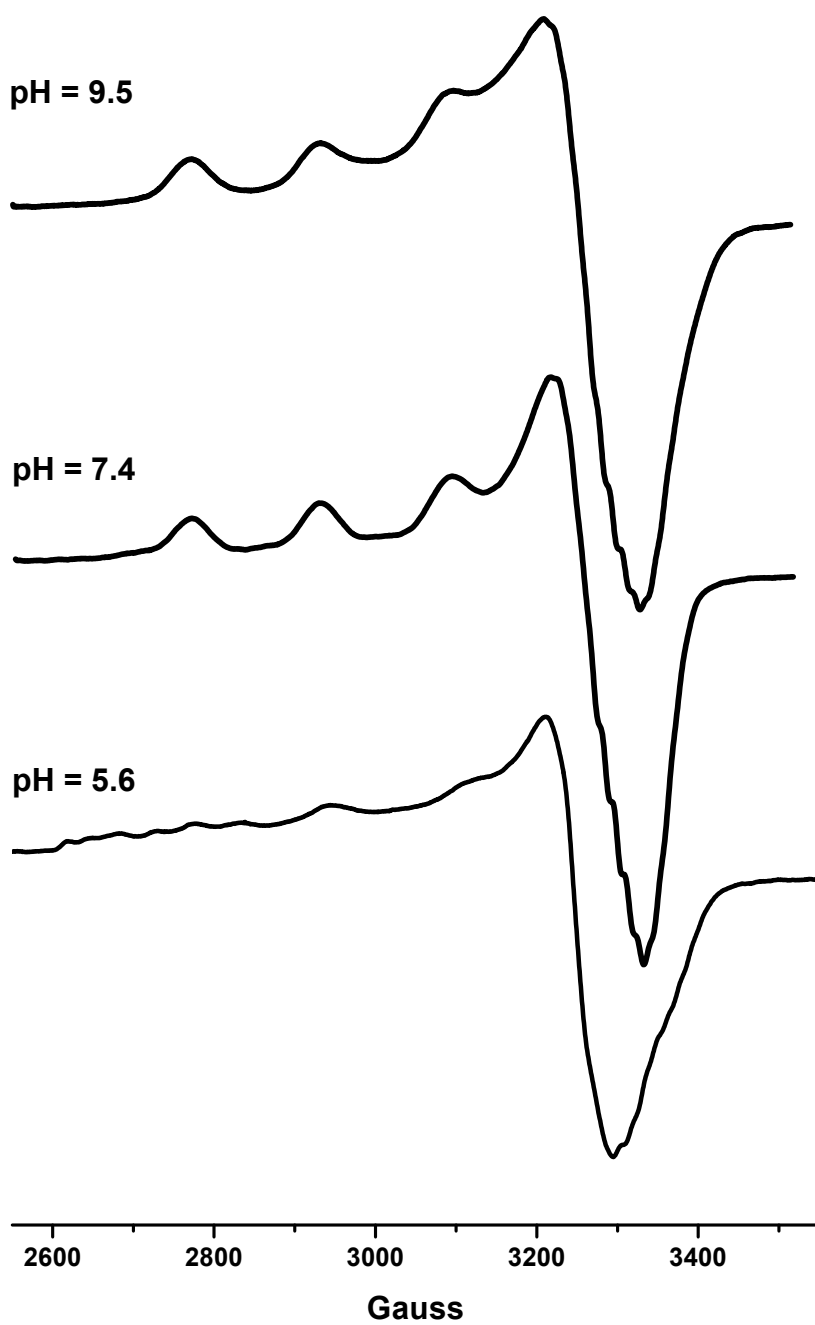

**Figure S2.** EPR spectra of Cu-AcNT3(5-13) at 1:1 molar ratio.  $[\text{Cu}^{2+}] = 1 \times 10^{-3} \text{ M}$

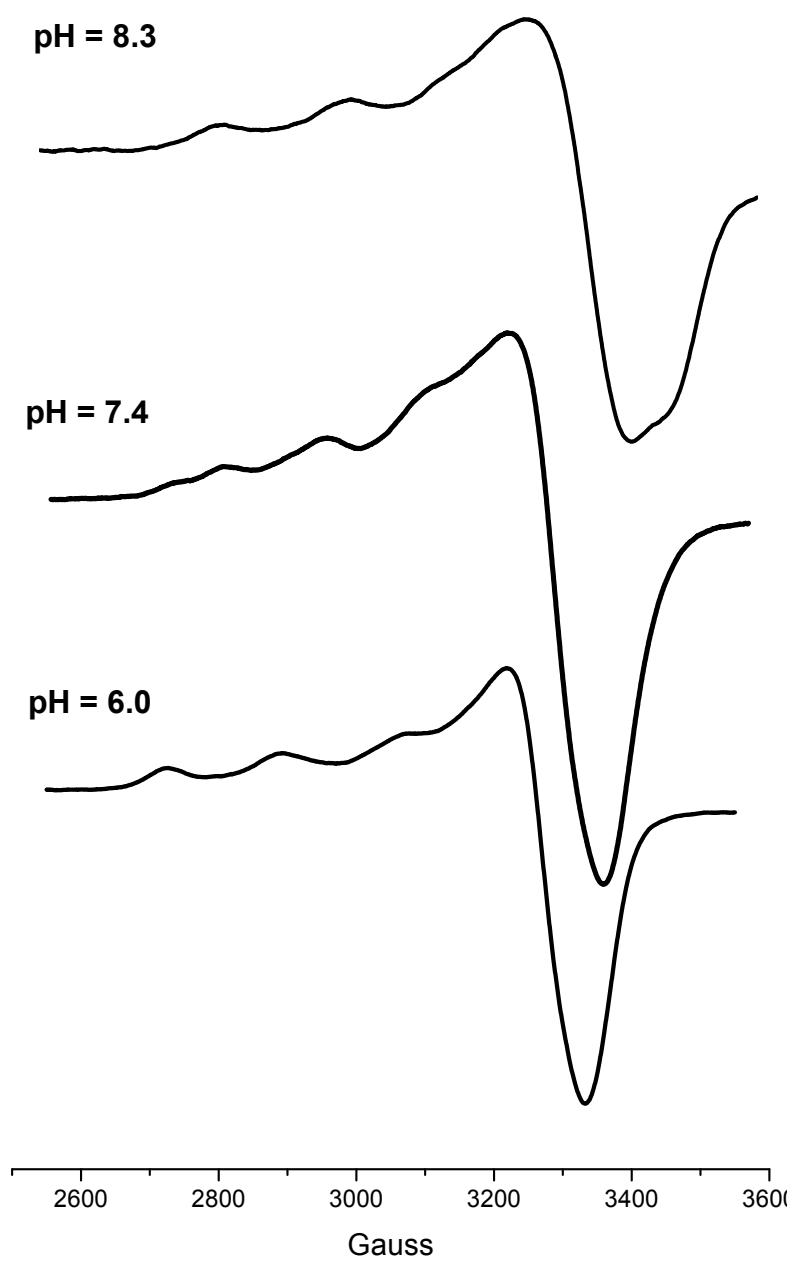

**Figure S3.** EPR spectra of Cu-NT3(1-13) at 1:1 molar ratio.  $[\text{Cu}^{2+}] = 1 \times 10^{-3} \text{ M}$

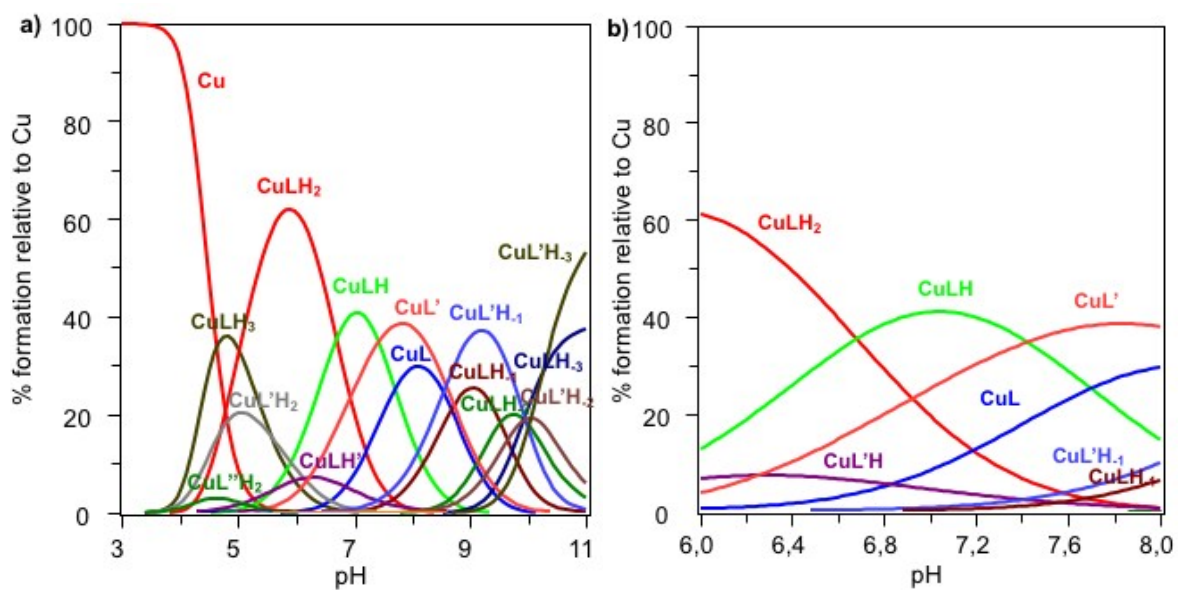

**Figure S4.** Species distribution diagram for the complexes formed with L = NT3(1-13); L' = NT3(1-5); L'' = AcNT3(5-13), [Cu(II)] = [L] = [L'] = [L''] = 1X10<sup>-3</sup> M; a) pH range 3-11; b) enlargement pH range 6-8.

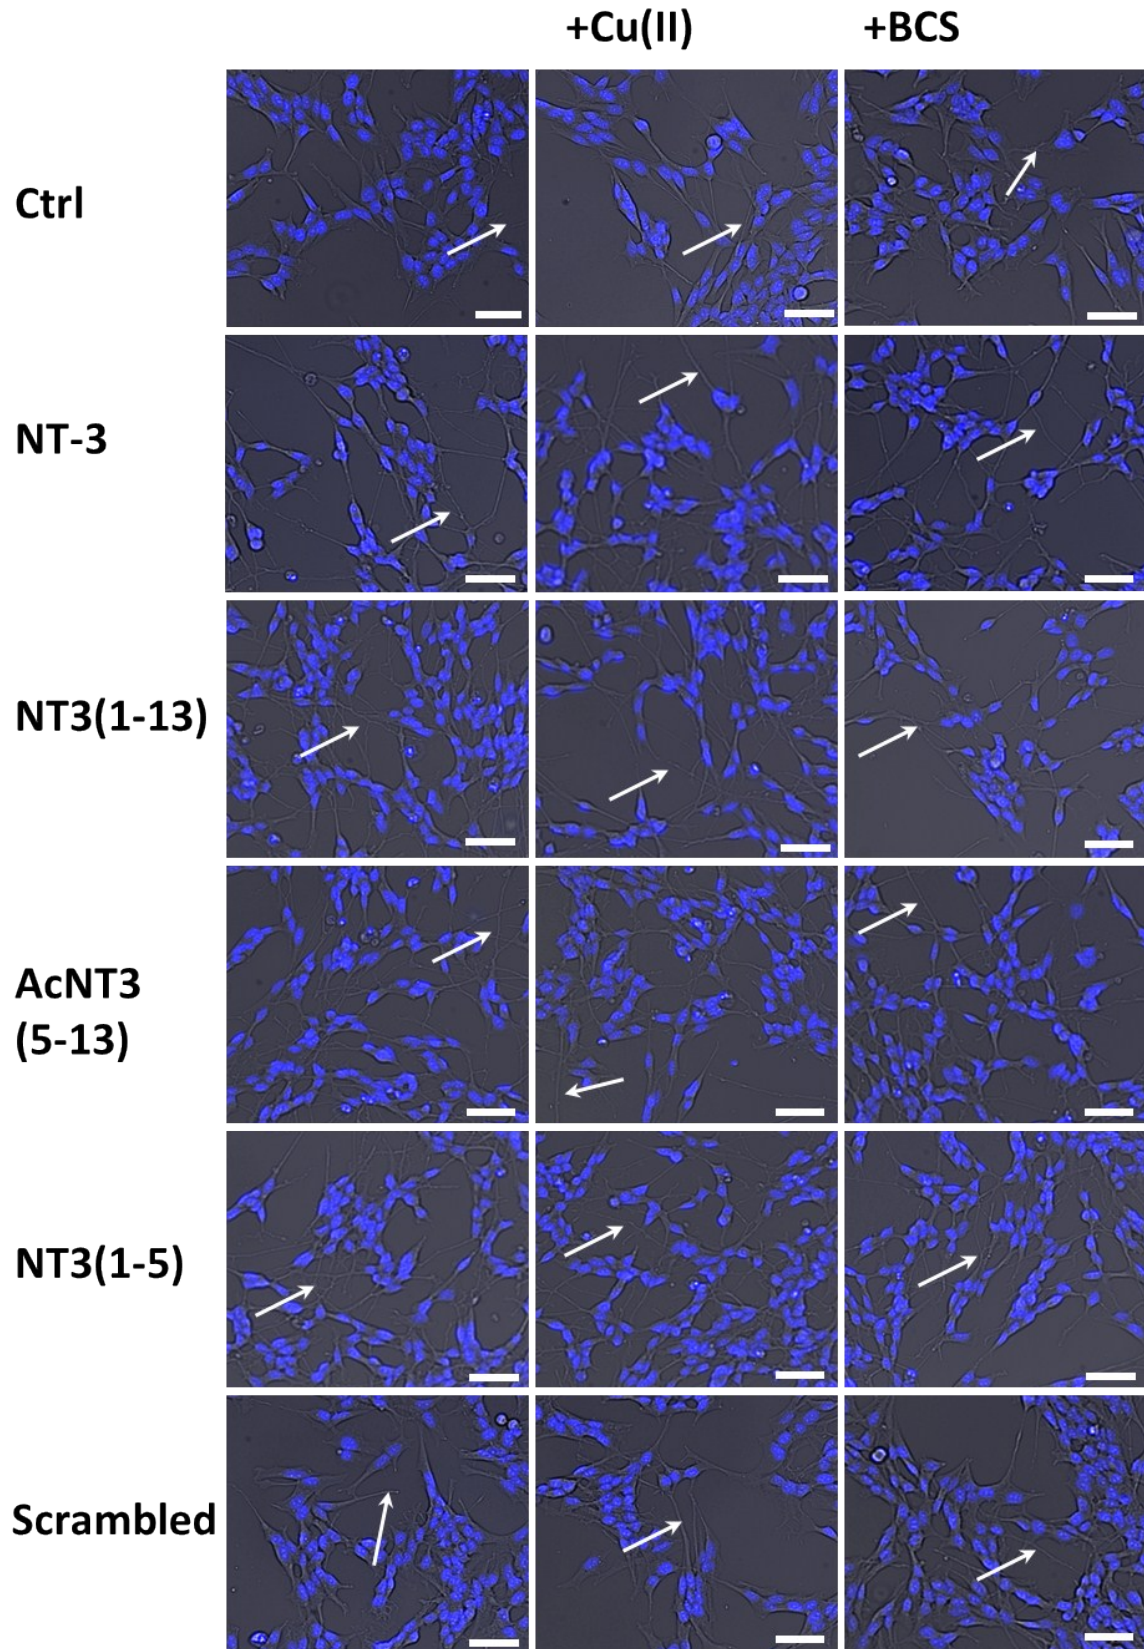

**Figure S5.** Phase contrast micrographs of SH-SY5Y cells untreated (a) and 72 hrs treated (in 0.5 % of FBS) with 50 ng/mL NT-3, 100  $\mu$ M **NT3(1-13)**, 100  $\mu$ M **AcNT3(5-13)**, 100  $\mu$ M **NT3(1-5)**, 100  $\mu$ M **scrambled peptide (Sc)**, in presence of copper(II) ions or BCS. The white arrows point to the neurite outgrowth. Scale bar = 100  $\mu$ m.

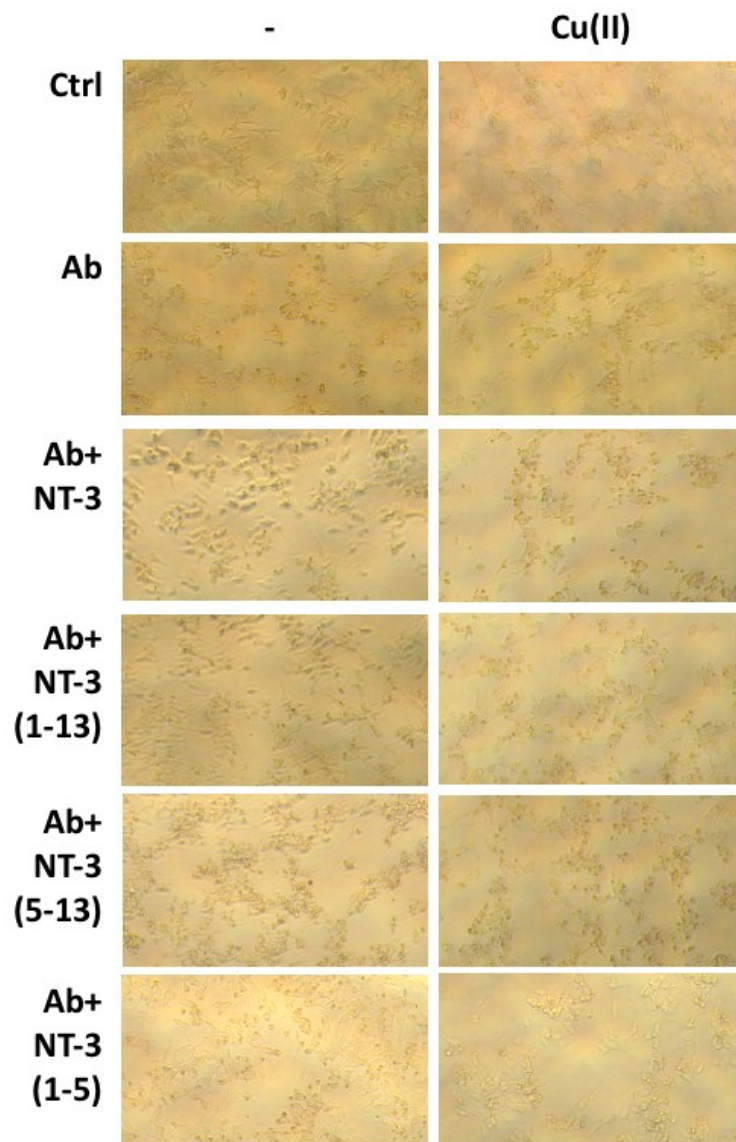

**Figure S6.** Phase contrast microscopy pictures of SH-SY5Y cells following a 1h of pre-treatment with anti-Trk antibody and after a 72 hrs of treatment with NT-3 whole protein or NT3 peptides in the presence or the absence of Cu(II). Original magnification  $\times 20$ . a) Control; b) Anti-Trk (Ab); c) Ab + NT-3; d) Ab + NT3(1-13); e) Ab + AcNT3(5-13); f) Ab + NT3(1-5)



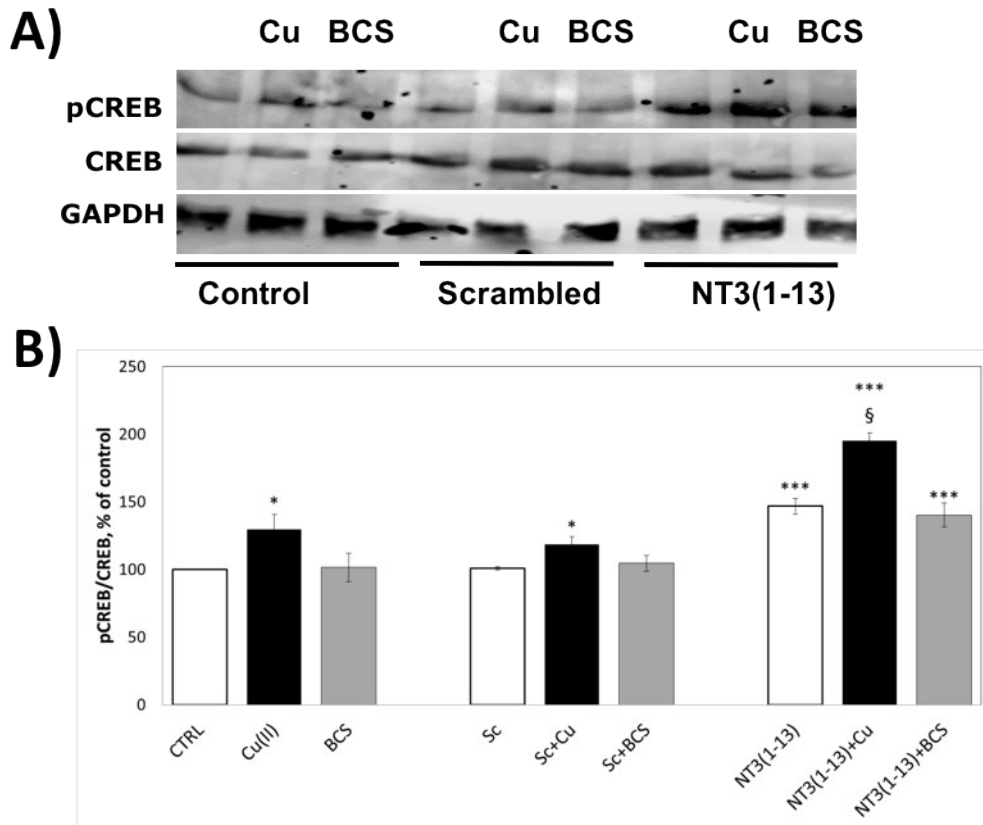

**Figure S7.** Representative western blotting (a) and densitometric analyses (b) of pCREB in neuroblastoma cell lysates. Cells were treated in the complete medium with 0.5 % of FBS for 30 min with 100  $\mu$ M of scrambled or NT3(1-13) peptides in the absence (●) or presence of 10  $\mu$ M of copper (○) or 50  $\mu$ M BCS (◐). For experiment with BCS, medium was 24 hrs pre-treated with BCS. Values are expressed as mean  $\pm$  SEM over at least three independent experiments. (\* =  $p \leq 0.05$  vs negative control, \*\*\* =  $p \leq 0.001$  vs. negative control, § =  $p \leq 0.05$  vs. NT3(1-13)).
